# Supplementary material for: Determinants of the host–guest interactions between α-, β- and γ-cyclodextrins and group IA, IIA and IIIA metal cations: a DFT/PCM study
Source: Royal Society of Chemistry journal article supplement (doi:10.1039/c7cp01253e), 2017-01-01
Supplement: c7cp01253e1.pdf [file c7cp01253e1.pdf]

## Determinants of the host-guest interactions between $\alpha$ -, $\beta$ - and $\gamma$ -cyclodextrins and group IA, IIA and IIIA metal cations: a DFT/PCM study

S. E. Angelova,<sup>a</sup> V. K. Nikolova<sup>b</sup> and T. M. Dudev<sup>c,\*</sup>

<sup>a</sup> Institute of Organic Chemistry with Centre of Phytochemistry, Bulgarian Academy of Sciences, 1113 Sofia, Bulgaria.

<sup>b</sup> Faculty of Chemistry and Pharmacy, Sofia University "St. Kl. Ohridski", 1164 Sofia, Bulgaria. E-mail: t.dudev@chem.uni-sofia.bg

### Supplementary Information

Experimental structural data from  $[\text{Mg}(\text{H}_2\text{O})_2(15\text{-crown-5})]^{2+}$  cation of  $[\text{Mg}(\text{H}_2\text{O})_2(15\text{-crown-5})]_3[\text{NO}_3]_6$  complex have been used to calibrate the theoretical method employed. An averaged experimental distance of 2.190 Å was calculated from the experimental  $\text{Mg-O}_{\text{crown}}$  distances of the X-ray structure determined by Junk and Steed<sup>[S1]</sup> (Figure S1):

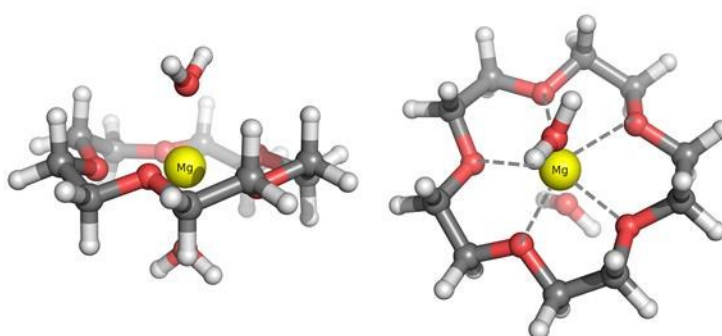

Figure S1.

**Table S1.** Experimental and calculated mean  $\text{Mg}^+ \text{-O}_{\text{crown}}$  distances in  $[\text{Mg}(\text{H}_2\text{O})_2(15\text{-crown-5})]^{2+}$  cation of  $[\text{Mg}(\text{H}_2\text{O})_2(15\text{-crown-5})]_3[\text{NO}_3]_6$  complex.

|                      | $\text{Mg-O}_{\text{crown}}$ distance, Å | Exp. – calc., Å |
|----------------------|------------------------------------------|-----------------|
| Exp. <sup>[S1]</sup> | 2.190                                    |                 |
| M062X/6-31G(d,p)     | 2.179                                    | 0.011           |
| M062X/6-31+G(d,p)    | 2.178                                    | 0.012           |
| M062X/6-31+G(2d,p)   | 2.176                                    | 0.014           |
| M062X/6-311G(d,p)    | 2.174                                    | 0.016           |
| M062X/6-311+G(d,p)   | 2.173                                    | 0.017           |
| B3LYP/6-31G(d,p)     | 2.207                                    | -0.017          |
| B3LYP/6-31+G(d,p)    | 2.205                                    | -0.015          |
| B3LYP/6-31+G(2d,p)   | 2.204                                    | -0.014          |
| B3LYP/6-311G(d,p)    | 2.203                                    | -0.013          |
| B3LYP/6-311+G(d,p)   | 2.202                                    | -0.012          |

<sup>[S1]</sup> P. C. Junk, J. W. Steed, *J. Chem. Soc., Dalton Trans.* **1999**, 407-414.
